# Supplementary material for: Differential expansion of T peripheral helper cells in early rheumatoid arthritis and osteoarthritis synovium
Source: PubMed Central journal article supplement (PMC9594577; doi:10.1136/rmdopen-2022-002563), 2022-10-21
Supplement: rmdopen-2022-002563supp001.pdf [file rmdopen-2022-002563supp001.pdf]

## Supplementary information

### **Differential Expansion of T Peripheral Helper Cells in early Rheumatoid Arthritis and Osteoarthritis Synovium**

William Murray-Brown<sup>1</sup>, Yanxia Guo<sup>2</sup>, Annabelle Small<sup>1</sup>, Katie Lowe<sup>1</sup>, Helen Weedon<sup>1</sup>, Malcolm D. Smith<sup>1</sup>, Susan Lester<sup>3</sup>, Susanna Proudman<sup>4,5</sup>, Navin L. Rao<sup>2</sup>, Ling-Yang Hao<sup>2</sup>, Sunil Nagpal<sup>2</sup>, Mihir D. Wechalekar<sup>1,6\*</sup>

<sup>1</sup>Department of Rheumatology, Flinders University, Bedford Park, South Australia, 5042, Australia

<sup>2</sup>Discovery Immunology, Janssen Research, 1400 McKean Road, Spring House, PA, 19477, USA

<sup>3</sup>Rheumatology Research Group, Basil Hetzel Institute, Adelaide, South Australia, 5011, Australia

<sup>4</sup>Department of Rheumatology, Royal Adelaide Hospital, Adelaide, Australia

<sup>5</sup>Discipline of Medicine, University of Adelaide, Adelaide, Australia.

<sup>6</sup>Department of Rheumatology, Flinders Medical Centre, Bedford Park, South Australia, 5042, Australia

*\*Correspondence:*

*Associate Professor Mihir Wechalekar*

*mihir.wechalekar@sa.gov.au*

#### Contents of Supplementary Information:

1. Supplementary Figure 1
2. Supplementary Figure 2

## Figure legends

**Supplementary Figure 1. Detection of PD-1 and CXCR5 expressing cells in disaggregated ST biopsy samples by flow cytometry.** Gating strategy to identify PD-1 and CXCR5 expressing memory CD4<sup>+</sup> T cells by flow cytometry and gating of CD4<sup>+</sup> T cells prior to t-SNE analysis. Cells were gated for lymphocytes, singlets, live cells, CD3<sup>+</sup> CD20<sup>-</sup> cells and CD4<sup>+</sup> CD8<sup>-</sup> cells prior to t-SNE or further gating for CD45RO<sup>+</sup> memory T cells and detection of PD-1 and CXCR5 expressing populations via 2-D dot plots.

**Supplementary Figure 2. Differential gene expression of CD4<sup>+</sup> T cells identified by viSNE analysis.** (A) viSNE plots of flow cytometry data from tonsil control and RA synovial tissue CD4<sup>+</sup> T cells. (B) viSNE plots of flow cytometry data from RA and, (C) healthy control peripheral blood CD4<sup>+</sup> T cells. Colour indicates cell expression levels of labelled marker. Ring indicates PD-1<sup>hi</sup> cells.

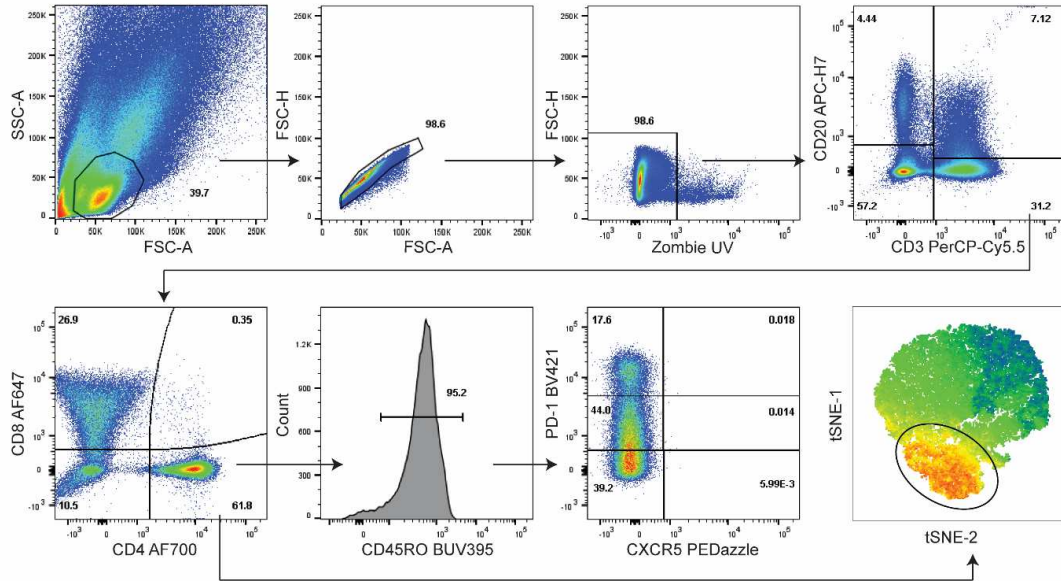

Supplementary Figure 1.

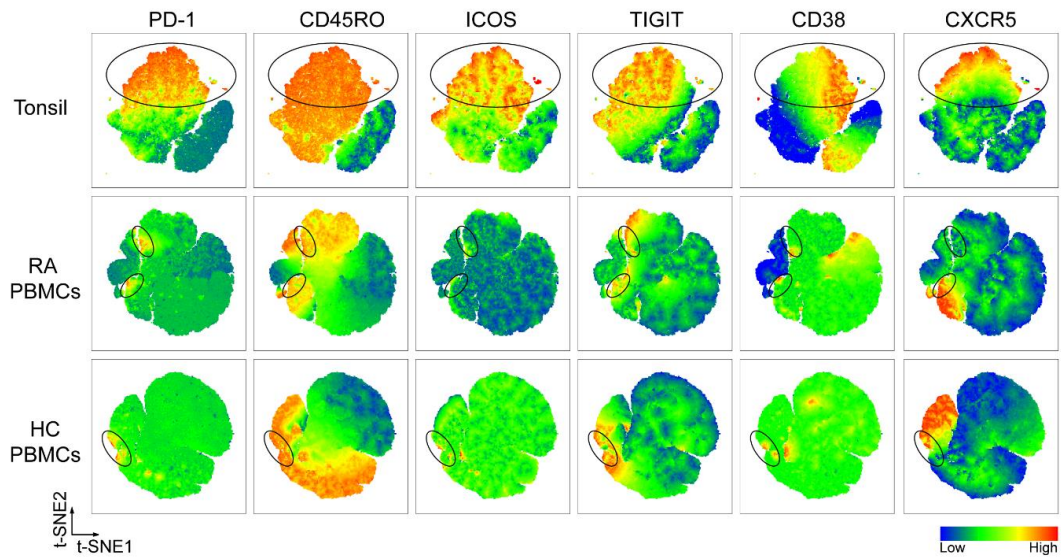

Supplementary figure 2.
